# Purchases dominate the carbon footprint of research laboratories

Marianne De Paepe,<sup>†</sup> Laurent Jeanneau,<sup>‡</sup> Jérôme Mariette,<sup>¶</sup> Olivier Aumont,<sup>§</sup>  
and André Estevez-Torres<sup>\*,||,⊥</sup>

<sup>†</sup>*Micalis Institute, INRA, AgroParisTech, Université Paris-Saclay, 78350 Jouy-en-Josas, France*

<sup>‡</sup>*Laboratoire Géosciences Rennes, UMR 6118, CNRS-Université de Rennes, Rennes, France*

<sup>¶</sup>*Université de Toulouse, INRAE, UR MIAT, F-31320 Castanet-Tolosan, France*

<sup>§</sup>*Sorbonne Université (CNRS/IRD/MNHN), LOCEAN-IPSL, Paris, France*

<sup>||</sup>*Sorbonne Université, CNRS, Institut de Biologie Paris-Seine (IBPS), Laboratoire Jean Perrin  
(LJP), F-75005, Paris, France*

<sup>⊥</sup>*Université de Lille, CNRS, Laboratoire de spectroscopie pour les interactions, la réactivité et  
l'environnement (UMR 8516 - LASIRE), F-59655, Villeneuve d'Ascq, France*

E-mail: [andre.estevez-torres@sorbonne-universite.fr](mailto:andre.estevez-torres@sorbonne-universite.fr)

## Abstract

Despite increasing interest for the carbon footprint of higher education institutions, little is known about the carbon footprint associated to research activities. Air travel and attendance to conferences concentrate recent data and debates. Here we develop a hybrid method to estimate the greenhouse gas emissions (GHG) associated to research purchases. To do so, we combine macroeconomic databases, research-centered companies footprints and life-cycle analysis to construct a public database of monetary emission factors (EF) for research purchases. We apply such EFs to estimate the purchases emissions of a hundred of research laboratories in France, belonging to the Labos 1point5 network and gathering more than 20000 staff, from all disciplines. We

12 find that purchases dominate laboratory emissions, with a median of 2.3 tCO<sub>2</sub> e/pers,  
13 accounting for more than 50% of emissions, and 3-fold higher than the separate contri-  
14 bution from travel, commutes and heating. Electricity emissions are 5-fold lower in our  
15 dataset of laboratories using low carbon electricity but they become preponderant for  
16 high carbon electricity mixes (3.5 tCO<sub>2</sub> e/pers). Purchases emissions are very hetero-  
17 geneous among laboratories, but are strongly correlated with budget, with an average  
18 carbon intensity of  $0.33 \pm 0.07$  kg CO<sub>2</sub>e/€ and differences between research domains.  
19 Finally, we quantify the effect of a series of demand-driven mitigation strategies obtain-  
20 ing a maximum reduction of 20 % in total emissions (−40 % in purchases emissions),  
21 suggesting that effectively reducing the carbon footprint of research activities calls for  
22 systemic changes.

## 23 Introduction

24 Planetary limits refer to the ensemble of physical, ecological and social constraints that  
25 limit the flux of matter and energy sustaining human societies.<sup>1</sup> They have been a subject  
26 of continuous discussion for at least two centuries.<sup>2–8</sup> This has spurred the necessity for  
27 implementing a material accountability, complementary to a monetary one, in order to curb  
28 material and energy flows associated to human activities.

29 Universities and research laboratories have greatly contributed and continue to actively  
30 contribute to a better understanding of these planetary limits, in particular concerning global  
31 warming<sup>9</sup> and biodiversity loss.<sup>10</sup> However, research itself has undesired impacts, both di-  
32 rectly by consuming natural resources and generating waste and greenhouse gases (GHG)<sup>11</sup>  
33 and indirectly through the discovery of processes and techniques that may increase the overall  
34 impact of humanity on the environment in the long run.<sup>12–14</sup>

35 Awareness of the direct impacts of academic research on the environment, and more  
36 specifically, on global warming, is illustrated by the steady increase in the scientific lit-  
37 erature on the carbon footprint of academic research and higher education.<sup>15</sup> In order to

38 quantify GHG emissions in research, two main approaches have been followed: a top-down  
39 and a bottom-up approach. In the former, the carbon footprint of whole universities was  
40 estimated using aggregated data from entire institutions, in general without distinguishing  
41 research and educational activities.<sup>15–18</sup> In the latter, the footprint of individual and specific  
42 research activities such as attending conferences or a PhD project,<sup>19</sup> scientific events such  
43 as international conferences<sup>20</sup> or disciplines,<sup>21,22</sup> were assessed.

44 The large majority of the footprints estimated by higher education institutions focuses on  
45 direct and energy-related emissions<sup>15,18</sup> (scope 1 and 2<sup>23</sup>) and only partially includes scope  
46 3 emissions,<sup>24</sup> i.e. those resulting from activities that occur in locations that are not owned  
47 by the institution. They are the most diverse and therefore, the most difficult to assess,  
48 which explains why they are rarely accounted for. Yet, scope 3 emissions, and among them,  
49 purchases of goods and services, can represent a large share of their total footprint.<sup>16,25,26</sup>  
50 Some studies suggest that they may account for as much as 80% of total emissions.<sup>17,27</sup>

51 In this work, we have taken an intermediate approach and selected the research labora-  
52 tory as a valuable perimeter to evaluate the carbon footprint of research activities. Within  
53 this boundary we first propose a method to estimate the carbon footprint of all the goods  
54 and services purchased in the laboratory. We construct a public listing of monetary emission  
55 factors (EFs) associated to 1431 categories of scientific purchases and 61 physical emis-  
56 sion factors associated to 8 labware categories using different databases and complementary  
57 methods to assess the robustness of our approach. These EFs can be used as is or through  
58 the web interface GES 1point5<sup>28</sup> to calculate the GHG emissions of laboratory purchases.  
59 We then compare the different emission sources from 167 carbon footprints associated to  
60 108 distinct French laboratories from all disciplines and show that purchases represent 50%  
61 of median emissions. Emissions in general and purchases emissions in particular are very  
62 heterogeneous between laboratories and research domains. Interestingly, we find a strong  
63 linear correlation between purchases emissions and budget with a carbon intensity of  $\sim 0.3$   
64 kg CO<sub>2</sub>e/ € for sciences and technology and life and health sciences laboratories and  $\sim 0.2$

65 kg CO<sub>2</sub>e/ € for human and social sciences laboratories. We conclude by discussing potential  
 66 mitigation strategies, highlighting the difficulty of reducing purchase-associated emissions in  
 67 certain disciplines.

## 68 Results and discussion

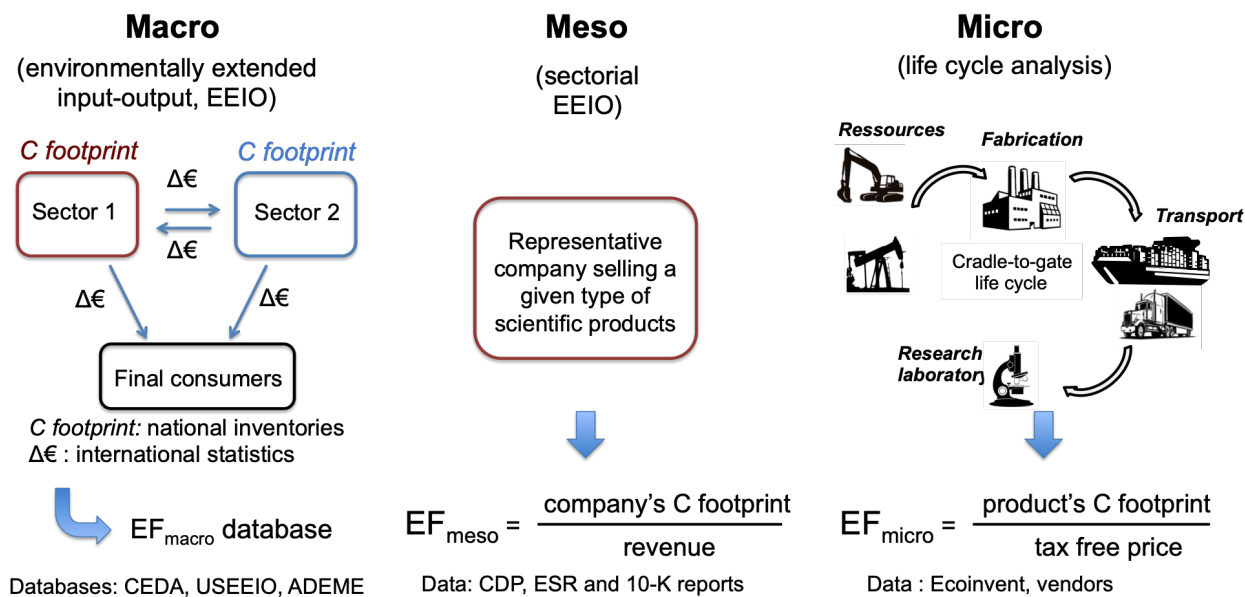

Figure 1: Scheme showing the three approaches used in this work to estimate monetary emission factors (EF) of purchased goods and services.

69 Emissions embodied in goods and services, can be estimated by measuring physical or  
 70 monetary flows. To make the problem tractable considering the large number of purchase  
 71 types in research laboratories, goods were classified according to the French system for  
 72 accountability in research (NACRES), to which we manually associated cradle-to-gate mon-  
 73 etary emission factors (EFs) in kg CO<sub>2</sub>e/€. Throughout the text all € values correspond to  
 74 year 2019. The emissions of good  $i$  were calculated as  $e(i) = p(i) \times EF(i)$ , with  $p(i)$  its price  
 75 in €. EFs were estimated using the three approaches sketched in Fig. 1: i) an environmen-  
 76 tally extended input-output (EEIO) method<sup>29</sup> that we will call in the following *macro* and  
 77 note EF<sub>macro</sub>; ii) a process-based method that we will call in the following *micro* (EF<sub>micro</sub>);

78 and iii) an intermediate approach based on the carbon intensity of selected companies of the  
79 research sector, that we will call in the following *meso* ( $EF_{meso}$ ).

80 Environmentally extended input-output (EEIO) methods associate environmental im-  
81 pacts to macroeconomic monetary flows between production and consumption sectors in a  
82 given economy or territory.<sup>29</sup> They have proven useful to estimate the carbon footprint of  
83 purchases in large organizations.<sup>30</sup> However, they should be used with caution when applied  
84 to niche products which are abundant in research laboratories. We therefore used a hybrid  
85 approach: for purchase categories most specific to research labs (scientific instruments and  
86 consumables), we completed the EEIO method by our meso and micro approaches.

## 87 Construction of the emission factor database

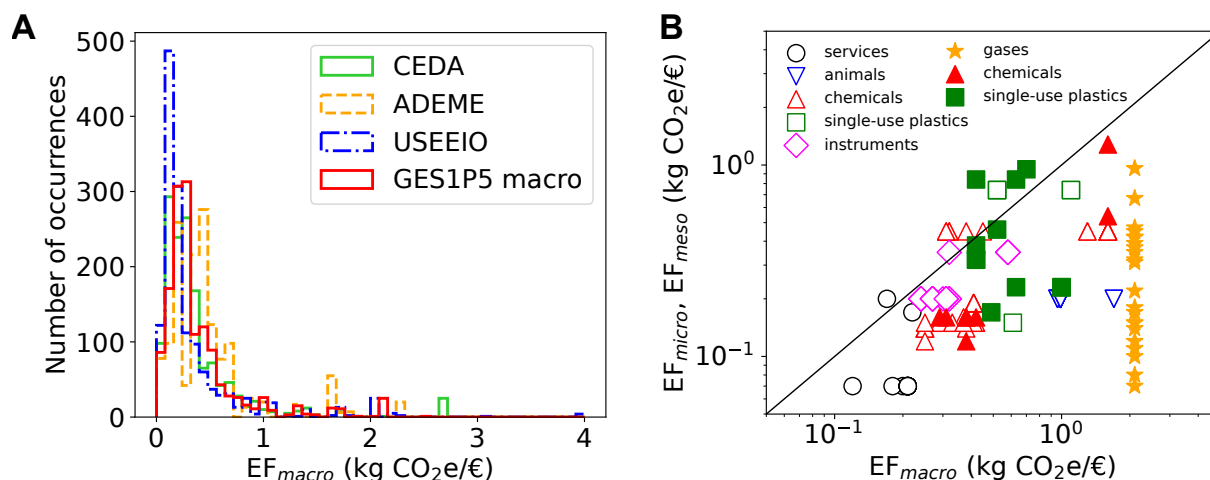

Figure 2: Construction of the GES1P5 NACRES-EF database for estimating the carbon footprint of research laboratories. A) Distribution of macro emission factors within the four macro NACRES-EF databases considered in this work. The  $y$  axis represents the number of NACRES codes assigned to a given EF among the 1431 NACRES codes within the purchases module in GES 1point5. B) Meso (open symbols) and micro (filled symbols) emission factors vs. GES1P5 macro EF for different types of purchases.

88 In a first step, each of the 1431 NACRES categories identifying goods and services was  
89 attributed one or several EFs from each one of three EEIO databases: the two American

90 CEDA<sup>31</sup> and USEEIO<sup>32,33</sup> databases, and the French ADEME<sup>34</sup> database, the first two pro-  
 91 viding 430 EFs and the last one 38. This constituted three databases of NACRES monetary  
 92 EFs, called in the following CEDA, USEEIO and ADEME, respectively. In a second step,  
 93 the GES1P5 macro database was constructed by averaging, for each NACRES category, the  
 94 EFs from the three other databases. Fig. 2 and Tab. 1 show the properties of the distri-  
 95 bution of EFs associated to the different NACRES categories for the four macro databases.  
 96 Lower EFs are more frequent in the USEEIO database, then comes the CEDA and then  
 97 the ADEME database with respectively medians of 0.19, 0.27 and 0.40 kg CO<sub>2</sub>e/€. The  
 98 GES1P5 macro database displays a mean EF that is indeed the average of the means of the  
 99 other three, with a distribution very similar to the CEDA one although without the very  
 100 high values (Fig. S2).

Table 1: Statistics of the distribution of emission factors (EF) within each NACRES-EF database and of purchases carbon intensities within the GES 1point5 lab emission database for the five NACRES-EF databases used in this work. All the quantities are in kg CO<sub>2</sub>e/€ and s.d. is the standard deviation.

| NACRES-EF database | EF   |        |      | Carbon intensity ( <i>I</i> ) |        |      |
|--------------------|------|--------|------|-------------------------------|--------|------|
|                    | Mean | Median | s.d. | Mean                          | Median | s.d. |
| USEEIO             | 0.33 | 0.18   | 0.45 | 0.29                          | 0.28   | 0.09 |
| CEDA               | 0.37 | 0.25   | 0.42 | 0.34                          | 0.34   | 0.08 |
| ADEME              | 0.47 | 0.40   | 0.41 | 0.43                          | 0.44   | 0.10 |
| GES1P5 macro       | 0.39 | 0.27   | 0.38 | 0.35                          | 0.35   | 0.08 |
| GES1P5 final       | 0.33 | 0.24   | 0.28 | 0.31                          | 0.30   | 0.07 |

101 In a third and final step, the GES1P5 macro was refined by substituting macro EFs  
 102 by meso or micro EFs. Meso EFs were computed by calculating the carbon intensity of  
 103 14 companies providing representative instruments, consumables and/or services to research  
 104 labs (Tabs. 2 and S4-S2). Similarly to corporate emissions in other industrial sectors,  
 105 companies' EF<sub>meso</sub> most heavily depend on the emissions related to purchased goods and  
 106 services, that represent 41 to 80% of their total emissions (Tab. S2). These 14 EF<sub>meso</sub> were  
 107 attributed to 102 NACRES categories (Tab. S1), with a median of 0.2 kg CO<sub>2</sub>e/€, which is

108 close to the median EF of the USEEIO database. Micro EFs were computed using cradle-  
109 to-gate single-impact life cycle assessments<sup>35</sup> (LCA) of 60 simple products that constitute a  
110 significant purchase amount in at least one discipline, mostly disposable plastic labware and  
111 gas cylinders (Tab. S3) and averaged by NACRES category to obtain 36  $EF_{micro}$ .

Table 2: Meso carbon intensities (corporate direct and upstream emissions divided by total sales) of companies whose main clients are research laboratories, aggregated by business segment. Details by company are given in Tabs. S4-S2. Data calculated from 36.

| Business segment                                              | Carbon intensity (kg CO <sub>2</sub> e/€) |
|---------------------------------------------------------------|-------------------------------------------|
| Gloves and hygienic equipment                                 | 0.74                                      |
| Chemicals                                                     | 0.45                                      |
| Global lab supplier (Instrumentation, consumables & services) | 0.13 – 0.38                               |
| Scientific equipment (> 80% of sales)                         | 0.18 – 0.35                               |
| Biotech consumables                                           | 0.14 – 0.16                               |
| Scientific services                                           | 0.07 – 0.19                               |

112 Fig. 2B shows the correlation between micro/meso EFs and macro ones. For a given  
113 category, on average,  $EF_{meso}$  are of the same order of magnitude than  $EF_{macro}$ , but globally  
114 2-fold lower. The difference is even more important for companies producing chemicals and  
115 animals for research, whose sector of activity was not represented in the EEIO databases. For  
116 categories corresponding to single-use plastics, with a single exception,  $EF_{micro}$  were close to  
117  $EF_{macro}$  (less than a 2-fold difference). However,  $EF_{micro}$  were much lower than  $EF_{macro}$  for  
118 chemicals, laboratory glassware and especially gas cylinders. This most probably reflects the  
119 small packaging of gases for laboratories compared to industries, resulting in much higher  
120 prices per kg of gas. With some exceptions (see methods), these micro and meso EFs were  
121 then incorporated into the GES1P5 macro database to constitute the GES1P5 final database.  
122 9 % of EFs were changed (7% with meso EFs and 2% with micro EFs), which accounted for  
123 a mean of 12% of lab purchases (in €), with high disparity from one lab to another (from  
124 0 to 53% of all purchases). Despite this small number of changes (Fig. S3), the use of the  
125 GES1P5 final database resulted in a 17% decrease of the average carbon intensities within  
126 all submissions compared with emissions calculated with the GES1P5 macro database (Tab.

127 1 and Fig. 3).

## 128 **The distribution of carbon intensities in the laboratory research** 129 **economy**

130 To gather financial purchase data from French laboratories to estimate their purchase emis-  
131 sions we relied on GES 1point5,<sup>37,38</sup> an online, free, open source tool developed by the Labos  
132 1point5 network.<sup>39</sup> We created a purchases module that allowed volunteer laboratories to  
133 upload their expenses associated to NACRES categories. Interestingly, GES 1point5 allows  
134 laboratories to estimate other emission sources such as scope 1 (owned vehicles, cooling  
135 gases), scope 2 (electricity and heating) and scope 3 (travels, commuting and computer de-  
136 vices) associated emissions. We designed the purchases module to avoid double counting with  
137 the emissions taken into consideration by the other modules. 108 laboratories submitted 167  
138 GHG purchases footprints for different years (mostly 2019).

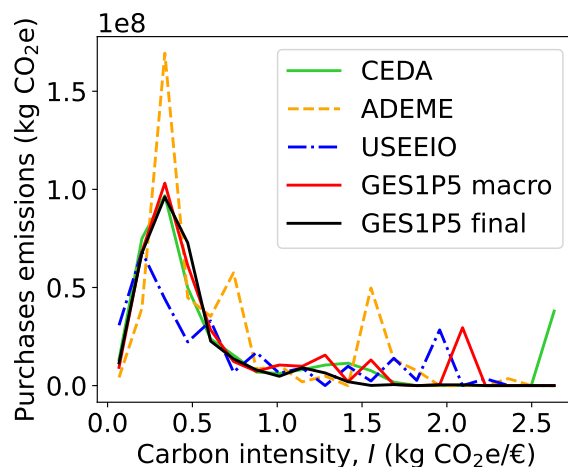

Figure 3: Distribution of carbon intensities within the GES 1point5 laboratory emission database for the five NACRES-EF databases.  $n = 167$  GHG submissions, 108 distinct laboratories, years 2018-2022.

139 Figs. 3 and S6 show the distribution of carbon intensities  $I$  in the ‘research laboratory  
140 economy’ captured by our data. Carbon intensities are weighted by the associated purchases



141 emissions from all laboratories calculated for the five NACRES-EF databases considered  
142 here. CEDA and GES1P5 macro provide similar distributions with averages  $\bar{I}$  of 0.34 and  
143 0.35 kg CO<sub>2</sub>e/€ respectively (Tab. 1). GES1P5 final resembles CEDA and GES1P5 macro  
144 for  $I < 1.0$  but it results in lower emissions at higher intensities which results in a lower  $\bar{I}$   
145 of 0.30 kg CO<sub>2</sub>e/€. USEEIO and ADEME provide extreme distributions with the former  
146 attributing lower emissions for low  $I$  ( $I < 0.6$ ) and higher emissions for high  $I$  ( $I > 1.5$ ),  
147 which yields  $\bar{I} = 0.28$  kg CO<sub>2</sub>e/€, and the later displaying three significant peaks at 0.4, 0.7  
148 and 1.6 kg CO<sub>2</sub>e/€, associated with a higher mean carbon intensity ( $\bar{I} = 0.43$  kg CO<sub>2</sub>e/€).  
149 These results highlight the interest of using different NACRES-FE databases to estimate  
150 purchases emissions as we can evaluate, at least partially, the incertitudes of the results. We  
151 conclude that the average carbon intensity of laboratory purchases is in the range 0.22 – 0.42  
152 kg CO<sub>2</sub>e/€, or  $0.32 \pm 0.10$  kg CO<sub>2</sub>e/€. This implies that the purchases emissions aggregated  
153 for all laboratories is estimated with a precision of 30 % by just multiplying the purchases  
154 budget by this average carbon intensity.

## 155 Purchases and electricity dominate laboratory emissions

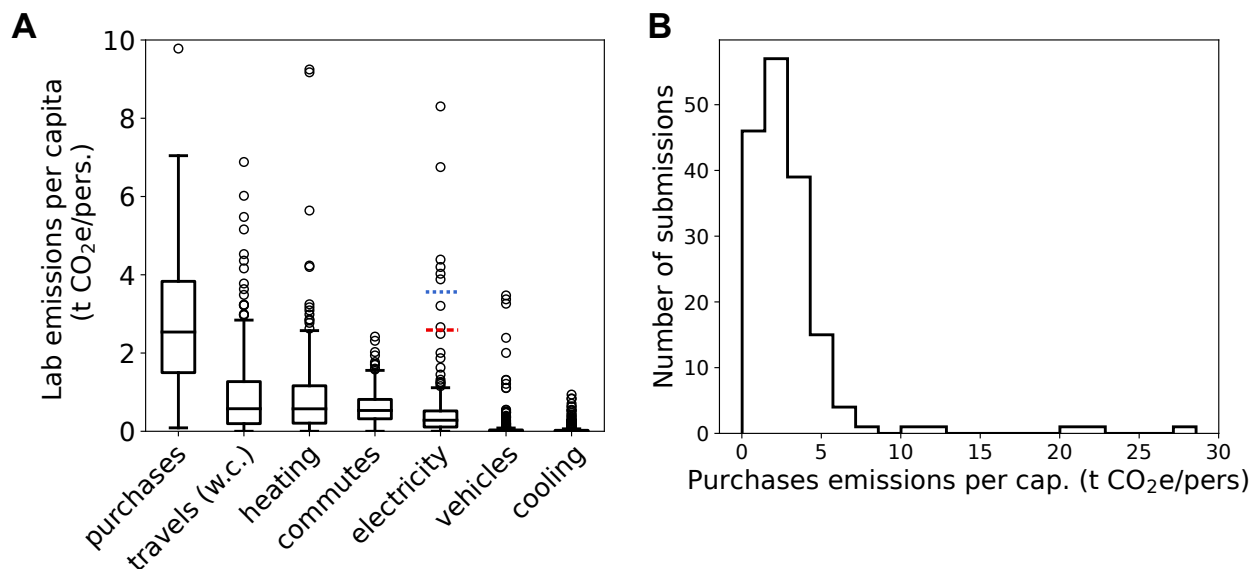

Figure 4: Purchases dominate GHG emissions among laboratories using low-carbon electricity. A) Boxplot of laboratory emissions per capita per emission source.  $n = 312$  for all types except for purchases ( $n = 167$ ). w.c. indicates that emissions associated to plane transportation were calculated with contrails.<sup>37</sup> Electricity emissions are calculated for three different mixes: French mix (boxplot in black), world mix (median as a dashed red line), and high-carbon mix (median as dotted blue line). Note that the  $y$  axis is truncated (see Fig. S8 and panel B). 203 distinct laboratories. B) Distribution of purchases emissions per capita. Purchases emissions calculated with the GES1p5 final NACRES-FE database.  $n = 167$  GHG submissions, 108 distinct laboratories, years 2018-2022.

156 We now have a robust method to estimate laboratory purchases emissions and in the following  
157 we will use solely GES1P5 final FEs to calculate them. An important question is the relative  
158 importance of each emission source as this conditions where the efforts of reduction need  
159 to be concentrated. Fig. 4A and Tab. S6 display the distribution of emissions for the  
160 eight types of emission sources in the GES 1point5 lab emission database. Importantly, this  
161 perimeter includes all upstream and in-house laboratory emissions except those due to heavy  
162 investments (such as construction and large scientific infrastructures) and staff meals. This  
163 database contains more than 300 GHG emission inventories from more than 200 laboratories  
164 employing more that 40000 staff, except for purchases for which more than 160 inventories  
165 from more than 100 different laboratories and employing more than 23000 staff were available

166 (Tab. S5). Median laboratory emissions are dominated by purchases with 56% of the share  
167 and a median of 2.5 t CO<sub>2</sub>e/pers. Travels, heating and commuting to work are far weaker  
168 with 12-13% and a median of 0.5-0.6 t CO<sub>2</sub>e/pers. Electricity (6%, 0.3 t CO<sub>2</sub>e/pers.) comes  
169 next, with electricity being particularly low in our dataset due to the low carbon emissions  
170 of the French electricity system (60 g CO<sub>2</sub>e/kWh<sup>40</sup>). Emissions associated to lab-owned  
171 vehicles and cooling systems are negligible on average. Laboratory emissions are however  
172 very heterogeneous and the distributions of per capita emissions per source are wide, as  
173 shown in Fig. 4B for purchases, with quartiles (1.5, 3.8) t CO<sub>2</sub>e/pers and extreme values of  
174 0.09 – 29 t CO<sub>2</sub> e/pers.

175 However, to compare these data internationally we need to correct by the carbon in-  
176 tensity of the electricity mix used by the laboratory. The average carbon intensity of the  
177 world electricity mix is 7.9-fold higher (475 g CO<sub>2</sub>e/kWh<sup>41</sup>), while the highest electricity  
178 intensities can be up to 11.7-fold higher (700 g CO<sub>2</sub>e/kWh<sup>42</sup>). In these cases the median  
179 of electricity emissions either equals purchases emissions per capita (2.4 t CO<sub>2</sub>e/pers) or  
180 becomes preponderant (3.5 t CO<sub>2</sub>e/pers).

## 181 **Purchases emissions are correlated to budget and research domain**

182 Fig. 5 shows that purchases emissions are strongly correlated to purchases budget with  
183 variations by research domain. Laboratory budgets in our database spanned  $2 \times 10^3 - 8 \times 10^6$   
184 € with a symmetric distribution of carbon intensities of mean 0.33 kg CO<sub>2</sub>e/€ and a s.d.  
185 of 0.07 CO<sub>2</sub>e/€. Human and social sciences (HSS) laboratories displayed significantly lower  
186 carbon intensities ( $0.20 \pm 0.04$  kg CO<sub>2</sub>e/€) while support laboratories, i.e. large experimental  
187 platforms that provide analysis services, display larger carbon intensities associated to a  
188 wider distribution ( $0.4 \pm 0.1$  kg CO<sub>2</sub>e/€, Tab. 3). Science and technology (ST) and life  
189 and health science (LHS) laboratories were associated to carbon intensities close to the  
190 mean (0.32 and 0.30 kg CO<sub>2</sub>e/€, respectively), with however a tendency of ST laboratories  
191 with high budgets to display slightly higher intensities. In contrast, the correlation between

192 emissions and number of staff was weaker (Fig. S9).

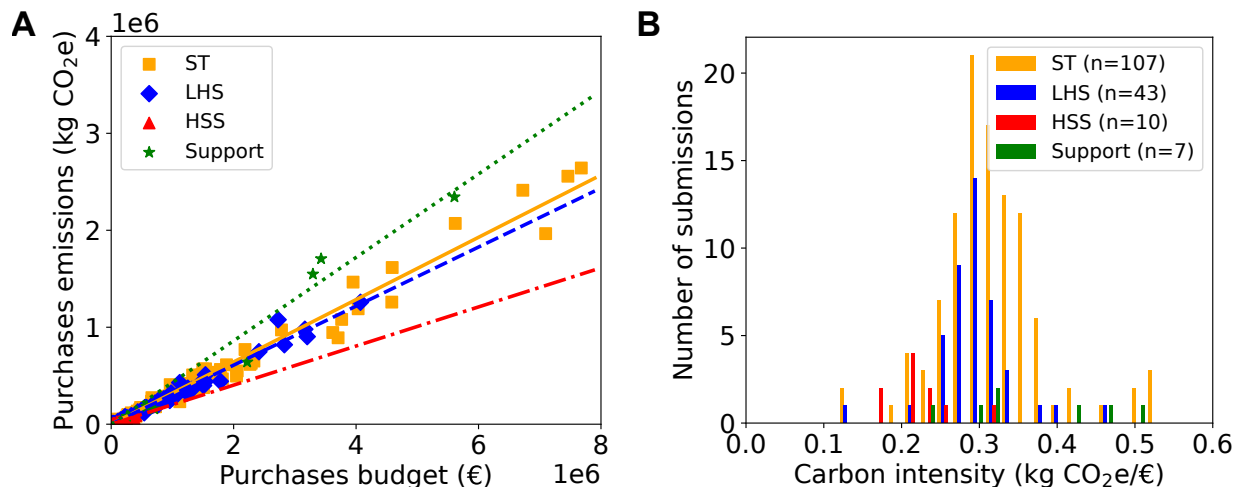

Figure 5: Purchases emissions are proportional to budget, with differences between research domains. A) Purchases emissions vs. budget for all GHG laboratory footprints in the GES 1point5 lab emission database. Lines are linear fits with zero intercept, whose results are provided in Tab. 3. B) Histogram of purchases carbon intensities for different scientific domains. HSS: Human and social sciences, LHS: Life and health sciences, ST: Science and technology.  $n = 167$  GHG submissions, 108 distinct laboratories, years 2018-2022.

Table 3: Linear fits of purchases emissions vs. purchases budget for different domains in Fig. 5A.

| Domain                          | Slope<br>(kg CO <sub>2</sub> e/€) | $R^2$ |
|---------------------------------|-----------------------------------|-------|
| Sciences and technology (ST)    | 0.32                              | 0.97  |
| Life and health sciences (LHS)  | 0.30                              | 0.97  |
| Human and social sciences (HSS) | 0.20                              | 0.96  |
| Support                         | 0.43                              | 0.96  |
| All                             | 0.33                              | 0.96  |

### 193 The typology of purchases emissions depend on research domain

194 We classified purchases into seven categories: consumables, IT, lab instruments, repairs &  
 195 maintenance, services, transport & hosting not included in travel and commuting, and lab-  
 196 oratory life (see SI Methods). The share of emissions for these categories strongly depended

197 on the research domain of the laboratory (Fig. 6A). For ST laboratories, purchases emis-  
198 sions are dominated by the acquisition of laboratory instruments ( $37 \pm 23$  %), while for LHS  
199 consumables dominate ( $35 \pm 18$  %). HSS laboratories exhibit a clearly different typology  
200 with three categories with shares close to 30% of emissions: IT, services and laboratory life.  
201 Weaker but still important contributions for ST laboratories are laboratory life, IT, con-  
202 sumables and services, while for LHS laboratories these are instruments, laboratory life, IT  
203 and services. Emissions associated to hosting during travels and to repairs and maintenance  
204 represent 5% or less of the purchases footprint.

205 Such differences imply that mitigation strategies should consider the scientific specificity  
206 of the laboratories. At the scale of a single laboratory, our method allows a finer view of  
207 the distribution of emissions among different purchases subcategories (Fig. S10). However,  
208 one must keep in mind that the financial categorization used here to identify purchases  
209 (NACRES) does not allow to distinguish between similar goods with potentially different  
210 carbon footprints, thus jeopardizing the estimation of supply-driven mitigation strategies,  
211 i.e. decreasing the emission factors.

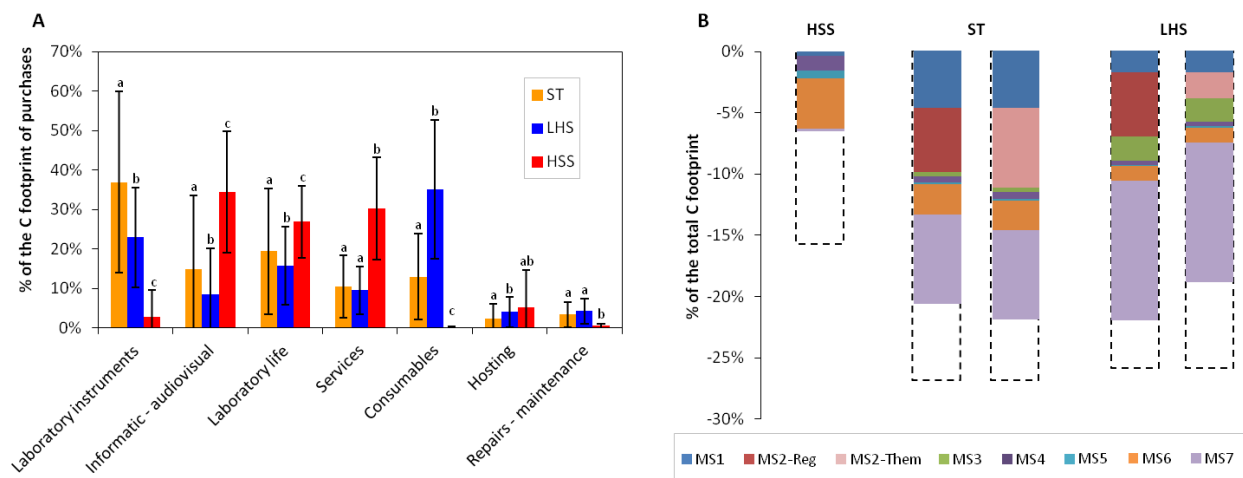

Figure 6: Typology of purchases emissions and quantification of mitigation strategies. A) Share of purchases emissions per research domain (colors) broken down by purchases category. Error bars correspond to one standard deviation and letters indicate significant differences ( $p < 0.05$ ). B) Relative reduction of the total carbon footprint by research domain expected within the GES 1point5 lab emission database for the seven mitigation strategies considered. MS1: +50% of lab equipment life-time; MS2: 50% pooling of lab equipment, either by region (-Reg) or by research sub-discipline (-Them); MS3: replace 80% of plastic by glass; MS4: 75% conversion to vegetarianism; MS5: -50% in furniture purchases; MS6: -50% in informatic purchases; MS7: -50% in consumable purchases. Dotted rectangles correspond to -50% in the purchases footprint. ST: science and technology ( $n = 107$ ), LHS: life and health sciences ( $n = 43$ ), HSS: human and social sciences ( $n = 10$ ) laboratories.

## 212 Identifying and quantifying mitigation strategies for scientific pur- 213 chases

214 Despite these limitations, it is possible to evaluate the effect of demand-driven mitigation  
215 strategies that involve reducing the purchase of certain items. We considered seven of such  
216 strategies applied to the three scientific domains (Fig. 6B) and we quantified their relative  
217 effect compared to the total carbon footprint of the laboratory (and not just the purchases  
218 footprint). Two mitigation strategies addressed scientific equipment: a 50% increase in  
219 equipment service life (MS1) and the pooling of 50% of equipments either by sub-discipline  
220 (MS2-Them) or by region (MS2-Reg). Two strategies focused on laboratory-life purchases:  
221 a 75% conversion of laboratory-paid catering to vegetarianism (MS4) and a 2-fold reduction

222 in furniture purchases (MS5). Two strategies concerned consumables: replacing 80 of plastic  
223 consumables by glass (MS3) and reducing 50% all consumables purchases (MS7). Finally, we  
224 considered the effect of reducing by 50% IT purchases (MS6). As expected from Fig 6A, the  
225 impact of these strategies was relatively similar for ST and LHS laboratories and different  
226 for HSS ones. For ST, the most effective strategies concerned reducing consumables (MS7),  
227 the pooling of instruments by sub-discipline (MS2-Them), increasing equipment life-time  
228 (MS1) and reducing IT (MS6). For LHS MS7 was also the most effective but instrument  
229 pooling by region (MS2-Reg) was preferred over MS2-Them, then came replacing plastic by  
230 glass in agreement with ref. 43 (MS3) and increasing life-time (MS1). Reducing furniture and  
231 conversion to vegetarianism was negligible for both domains. For HSS reducing IT purchases  
232 was the most effective, followed by conversion to vegetarianism. The addition of all seven  
233 strategies reduced by  $\sim 40\%$  the footprint associated to purchases and thus by  $\sim 20\%$  the  
234 total footprint, i.e.  $1.3 \text{ t CO}_2\text{e/pers.}$  on average, both for ST and LHS laboratories. In  
235 contrast, for HSS, the purchases footprint reduction was  $\sim 20\%$  and the total one was  $\sim 6\%$ ,  
236 i.e.  $0.2 \text{ t CO}_2\text{e/pers.}$  on average. We conclude that demand-driven mitigation strategies  
237 may be very effective to reduce the carbon footprint of both ST and LHS laboratories.

## 238 Discussion and conclusion

239 Purchases emissions are almost systematically neglected<sup>15,18,25</sup> when calculating the carbon  
240 footprint of higher education institutions, except in few seminal studies.<sup>16,17,44</sup> However,  
241 these works do not separate research and teaching activities, they only analyze a single  
242 institution and use a single set of monetary EFs. The average carbon intensity calculated by  
243 Larsen et al. for a Norwegian technical university,<sup>16</sup>  $0.39 \text{ kg CO}_2\text{e/€ 2019}$ , is close to the one  
244 calculated here for a French database of more than hundred different laboratories ( $0.33 \pm 0.07$   
245  $\text{kg CO}_2\text{e/€ 2019}$ ). Interestingly, however, Larsen et al did not find significant differences  
246 in the carbon intensities between research domains (Tab. S7), in particular with HSS, in

247 contrast to the current work. We thus hypothesize that the distinction between research and  
248 teaching activities is important because the heterogeneity of purchases emissions found in our  
249 data suggest that mitigation strategies will need to be adapted to each laboratory. However,  
250 the results obtained for HSS laboratories need to be considered with caution because only 10  
251 footprints from 8 distinct laboratories were available in the GES 1point5 laboratory emission  
252 database.

253 In addition, available data of purchases footprints in universities rely on either non-public  
254 EF<sup>16</sup> or general-economy EEIO EF databases such as EXIOBASE,<sup>45</sup> thus not offering a gen-  
255 eral method for research laboratories. Our results indicate that the NACRES-EF database  
256 allows to calculate laboratory purchases emissions with a 20% precision, although further  
257 work needs to be done to refine emissions associated to laboratory instruments. In addition,  
258 previous works do not show the great heterogeneity of emissions among research laboratories,  
259 both between different emission sources and within purchases alone. Importantly, our data  
260 suggest that laboratory budget is the main driver of purchases emissions, in a similar way  
261 as income determines the carbon footprint of households.<sup>46</sup>

262 The strong linearity observed between purchases emissions and budget in Fig. 5A is  
263 intriguing. On the one side, one may argue that this linearity is consubstantial to a model  
264 using monetary EFs, and thus it is not a result per se. On the other hand, the distribution  
265 of carbon intensities in our data (Figs. 3 and 5B) is relatively large, and thus suggests that  
266 both the linearity and the differences in the carbon intensities observed between domains  
267 are a result and not an artefact of our model.

268 The monetary and aggregated approach that we have followed in this study does not  
269 allow evaluating mitigation strategies coming from choices of consumables or instruments  
270 with lower carbon footprint than their classical counterparts (supply-based strategies). Such  
271 mitigation strategies must be subject to specific estimates based on physical factors and  
272 data from suppliers. The difficulty of these mitigation strategies is that they require precise  
273 determination of the carbon footprints of one type of product from different manufacturers



274 (or of different models of the same supplier). Few data exist for convenience goods that  
275 are part of lab purchases such as computers or printer toners. But for most laboratory  
276 equipment an additional difficulty is that they are made up of components manufactured in  
277 very small series, and LCA databases contain only data on mass-produced products that have  
278 high production costs relative to overhead. In consequence, precise process-based carbon  
279 footprints are so far inexistent for laboratory equipments or specific consumables, limiting  
280 the possibility to evaluate mitigation strategies based on supplier specific processes for labs.  
281 Concerning the monetary factor approach, it should be noted that on the long term, general  
282 decarbonation of industry worldwide should reflect on decrease of EF monetary ratios.

## 283 **Methods**

### 284 **Classification of goods and approach**

285 Services and goods purchased in a laboratory are classified according to the French NACRES  
286 nomenclature, used in the accountability of the majority of research institutions in France.<sup>47</sup>  
287 Each type of good or service is identified by a code composed of two letters and two numbers.  
288 The first letter provides the general category of the purchase, the second letter designs the  
289 domain, the first number the sub-domain and the last number the type. There are 1431  
290 defined types split into 24 large categories (Tab. S1). In this work, each NACRES code is  
291 given an EF covering GHG emissions associated to all stages of its production (cradle-to-gate  
292 perimeter). Each NACRES code is given an EF using the *macro* method (see below), and  
293 certain types of goods were also attributed a meso or a micro EF (see below), that were used  
294 to construct a final hybrid database. This final database contained 1281 macro, 108 meso  
295 and 43 micro EFs (Tab. S1). Complete methodology is described in the SI file.

## 296 **The macro approach**

297 To associate EFs with each NACRES code while having an uncertainty estimate, we used  
298 three different EEIO databases of monetary emission factors: the French *Ratios Monétaires*  
299 database published by the *Agence De l'Environnement et de la Maîtrise de l'Energie* (ADEME) in  
300 2016; the U.S. CEDA<sup>31</sup> database provided by Vitalmetrics (version 4.8 released in 2014);  
301 and the U.S. USEEIO<sup>32,33</sup> compiled by the US Environmental protection agency (EPA, pub-  
302 lished in 2018). Both American databases contain approximately the same 430 categories,  
303 while the French ADEME database provides monetary factors for only 38 categories.<sup>34</sup> As  
304 the NACRES types cannot always be associated to a single category of the EEIO databases,  
305 we associated up to 2 ADEME EFs and up to 6 CEDA/USEEIO EFs to each NACRES  
306 category (Tab. S1). We proceeded heuristically by attempting to assign all the EEIO cate-  
307 gories of commodities that have similarities (in terms of composition and/or manufacturing  
308 process) with the products comprised in each NACRES type. To provide a single EF for  
309 each NACRES we averaged the allocated EFs, first within each database, and then between  
310 databases. For each EF we calculated uncertainties using two methods. First, attribution  
311 uncertainties were computed as the standard deviation of the averaging within databases  
312 and across databases. Second, a uniform relative uncertainty of 80% was attributed to all  
313 EF. For calculating the footprint of a single laboratory we recommend to use the 80% un-  
314 certainty. However, for the results displayed in this work, EF uncertainties did not play any  
315 role.

## 316 **The meso approach**

317 To consolidate macro NACRES-FE database, we used a supplier-based approach, using GHG  
318 emissions and financial data of companies whose main segments of activity are to manufac-  
319 ture products of provide services to the research, analytical and health markets. We gathered  
320 emission data from the Carbon Disclosure Project (CDP)<sup>36</sup> or from internal reports, and  
321 financial data from the annual reports of companies. A limitation of this approach is that, in

322 November 2022, reasonably complete and reliable GHG emissions (including upstream scope  
323 3) were available only for few large companies, listed in Tabs. S4 and S2. The emission cate-  
324 gories used encompass all upstream activities involved in the production of goods or services,  
325 similarly to the cradle-to-gate perimeter of EEIO databases, but also downstream transporta-  
326 tion as most shipment costs are included in prices for laboratory products. The meso mon-  
327 etary EFs are then computed as  $EF_{meso} = (\text{scope 1+2+3 upstream emissions})/(\text{revenue})$ .

## 328 **The micro approach**

329 For laboratory mono-material products that represented important purchases from a panel  
330 of laboratories, we performed single impact cradle-to-gate LCA. This concerned 60 products  
331 distributed in 28 NACRES categories, such as all gases and some plasticware and glassware  
332 (Table S3). LCA included raw material manufacturing, item manufacturing and transport to  
333 the local supplier. Emission factors of each step were obtained from the Ecoinvent database  
334 version 3.8. The product monetary EFs are then computed by dividing the product carbon  
335 footprint by its price. More information about the Ecoinvent EFs and prices used is provided  
336 in the SI. The micro monetary EF are then computed as the mean of the monetary EFs of all  
337 products belonging to the same NACRES category (1 to 6 products by NACRES category).

## 338 **Data collection and treatment**

339 All data used in this study have been collected with the GES 1point5 web application.<sup>37,38</sup> For  
340 this purpose, a new module has been developed and implemented in the existing application.  
341 Volunteer French research laboratories submitted their purchase data through GES 1point5  
342 as a csv file with NACRES codes and the associated tax-free purchase price. Since heating,  
343 electricity, commuting, professional travels and computers were already included in GES  
344 1point5 as dedicated modules, each NACRES code has been allocated a tag called 'Module'  
345 that can take five different values: PURCHASE, ENERGY, VEHICLES, TRAVEL and  
346 COMPUTER. The monetary approach described here is only used to calculate the emissions

347 of the NACRES types labeled PURCHASE. In this work, purchases emissions are the sum of  
348 emissions calculated via the purchases module (via monetary EFs) and the computer devices  
349 module (via physical EFs) of GES 1point5. However, emissions related to the devices module  
350 were negligible compared to those of the purchases module. Emissions related to the other  
351 sources are computed differently by the dedicated modules of GES 1point5 with EFs based  
352 on physical flows as described by 37.

353 Data analysis was performed using custom Python routines. The purchases are clas-  
354 sified in 7 aggregated categories in order to facilitate the interpretation of the emissions  
355 and the identification of action strategies. These categories are *lab.life* (Food, landscaping,  
356 leisure, building), *consumables* (Raw materials, chemicals/biologicals and living organisms),  
357 *lab.equipment* (Laboratory equipment and instruments), *transport* (professional travel, in-  
358 cluding lodging but excluding transport), *info* (computers and audio-video equipment), *ser-*  
359 *vices* and *maintenance*. Note that the *info* category only includes the NACRES types that  
360 are not accounted for in the COMPUTER module of GES1p5 (see the SI for more informa-  
361 tion). A third tag called ‘Poste’ indicates for each type the emission category as described  
362 in the standard GHG protocol.<sup>23</sup>

## 363 **Mitigation strategies**

364 Six mitigation strategies (MS) were calculated.

365 MS1 assumes a 50% increase in the service life of laboratory equipments. The total  
366 carbon footprint and the footprint of “equipments” and of “repair and maintenance” were  
367 summed by discipline. The footprint of equipments was divided by 1.5 and the footprint of  
368 repair and maintenance was multiplied by 1.5.

369 MS2 assumes a pooling of 50% of laboratory equipments. For the pooling by discipline,  
370 the total footprint and the footprint of “equipments” and of “repair and maintenance” were  
371 summed by discipline, while for the pooling at the regional scale, the total footprint and the  
372 footprint of “equipments” and of “repair and maintenance” were summed by administrative

373 region if at least 9 GHG assessments were available (four regions). The footprint of equip-  
374 ments was divided by 2 and the footprint of repair and maintenance was multiplied by 2.  
375 The results at the regional scale are the average of four regions.

376 MS3 assumes an 80% decrease in the use of disposable plastic consumables (NACRES  
377 codes NB02, NB03, NB04, NB11, NB12, NB13, NB14, NB15, NB16 and NB17). It implies  
378 an 80% increase in the use of consumables for washing machines (NACRES code NB34). The  
379 first year, it also implies an increase in the purchases of glassware (NACRES code NB43;  
380  $EF = 0.23 \pm 0.1 \text{ kg CO}_2\text{e}/\text{€}$ ) for an amount equivalent of twice the amount of disposable  
381 plastic consumables. From the second year, a 5% breakage was assumed. The total footprint  
382 and the footprint of disposable plastic consumables and of consumables for washing machine  
383 were summed by discipline.

384 MS4 assumes a 50% decrease in the purchases of furniture (NACRES code AB.02). The  
385 total footprint and the footprint of furniture were summed by discipline. The footprint of  
386 furniture was divided by 2.

387 MS5 assumes a change in diet with an increase in the proportion of vegetarian menu.  
388 The total footprint and the footprint of catering services (NACRES codes AA63, AA64)  
389 were summed by discipline. According to ADEME, the mean footprint of a traditional meal  
390 in France is 2.04 kg CO<sub>2</sub>e and the mean footprint of a vegetarian meal is 0.5 kg CO<sub>2</sub>e.  
391 Assuming a 75 % conversion to vegetarianism, the footprint of catering services was divided  
392 by 3.

393 MS6 assumes a 50% decrease in consumables. Two classes of consumables were con-  
394 sidered. The first one was laboratory consumables and corresponded to the category “con-  
395 sumables”. The second one was consumables for scientific equipments and was included  
396 in the category “laboratory instruments”. The footprint of this class of consumables was  
397 determined by removing the footprint of equipments to the footprint of the category “labo-  
398 ratory instruments”. The total footprint and the footprint of consumables were summed by  
399 discipline. The footprint of consumables was divided by 2.

## 400 **Acknowledgement**

401 We thank Lucille Zribi, Christophe Brun, Franck Davoine and Aymeric Serazin for early  
402 developments of the NACRES-FE database, Tamara Ben-Ari, Anthony Benoist and Philippe  
403 Loubet for helpful discussions, Odile Blanchard, Samuel Calvet, Julian Carrey, Fabienne  
404 Gauffre, Etienne-Pascal Journet, Sandrine Laguerre, Arthur Leblois, Anne-Laure Ligozat,  
405 Elise Maigne, Gerald Salin and Zhou Xu for testing the purchases module of GES 1point5  
406 and the hundreds of research staff that uploaded carbon footprint data to the GES 1point5  
407 laboratory emission database. This work was conducted as part of the research network  
408 GDR Labos 1point5, funded by ADEME, CNRS and INRAE. It has also been partially  
409 supported by the overheads of the European research council grant Mesomat.

## 410 References

- 411 (1) Steffen, W. et al. Planetary boundaries: Guiding human development on a changing  
412 planet. *Science* **2015**, *347*.
- 413 (2) Jevons, W. *The Coal Question*; Macmillan, 1865.
- 414 (3) Georgescu-Roegen, N. *The entropy law and the economic process*; Harvard University  
415 Press, 1971.
- 416 (4) Meadows, D. H.; Meadows, D. L.; Randers, J.; Behrens III, W. W. *The limits to growth*;  
417 1972.
- 418 (5) Hansen, J.; Nazarenko, L.; Ruedy, R.; Sato, M.; Willis, J.; Del Genio, A.; Koch, D.;  
419 Lacis, A.; Lo, K.; Menon, S.; Novakov, T.; Perlwitz, J.; Russell, G.; Schmidt, G. A.;  
420 Tausnev, N. Earth's Energy Imbalance: Confirmation and Implications. *Science* **2005**,  
421 *308*, 1431–1435.
- 422 (6) IPCC, *Climate Change 2014: Synthesis Report. Contribution of Working Groups I,*  
423 *II and III to the Fifth Assessment Report of the Intergovernmental Panel on Climate*  
424 *Change*; Report, 2014.
- 425 (7) Steffen, W.; Broadgate, W.; Deutsch, L.; Gaffney, O.; Ludwig, C. The trajectory of the  
426 Anthropocene: The Great Acceleration. *The Anthropocene Review* **2015**, *2*, 81–98.
- 427 (8) Jürgen, R. The Evolution of Knowledge: Rethinking Science in the Anthropocene.  
428 *HoST - Journal of History of Science and Technology* **2018**, *12*, 1–22.
- 429 (9) IPCC, *Synthesis report of the IPCC sixth assessment report (AR6)*; Report, 2023.
- 430 (10) IPBES, *Global assessment report on biodiversity and ecosystem services of the IPBES*;  
431 Report, 2019.

- 432 (11) Urbina, M. A.; Watts, A. J. R.; Reardon, E. E. Labs Should Cut Plastic Waste Too.  
433 *Nature* **2015**, *528*, 479–479.
- 434 (12) Brockway, P. E.; Sorrell, S.; Semieniuk, G.; Heun, M. K.; Court, V. Energy efficiency  
435 and economy-wide rebound effects: A review of the evidence and its implications.  
436 *Renewable and Sustainable Energy Reviews* **2021**, *141*, 110781.
- 437 (13) White, L. The Historical Roots of Our Ecologic Crisis. *Science* **1967**, *155*, 1203–1207.
- 438 (14) Voulvoulis, N.; Burgman, M. A. The Contrasting Roles of Science and Technology in  
439 Environmental Challenges. *Critical Reviews in Environmental Science and Technology*  
440 **2019**, *49*, 1079–1106.
- 441 (15) Valls-Val, K.; Bovea, M. D. Carbon footprint in Higher Education Institutions: a liter-  
442 ature review and prospects for future research. *Clean Technologies and Environmental*  
443 *Policy* **2021**, *23*, 2523–2542.
- 444 (16) Larsen, H. N.; Pettersen, J.; Solli, C.; Hertwich, E. G. Investigating the Carbon Foot-  
445 print of a University - The case of NTNU. *Journal of Cleaner Production* **2013**, *48*,  
446 39–47.
- 447 (17) Ozawa-Meida, L.; Brockway, P.; Letten, K.; Davies, J.; Fleming, P. Measuring Carbon  
448 Performance in a UK University through a Consumption-Based Carbon Footprint: De  
449 Montfort University Case Study. *Journal of Cleaner Production* **2013**, *56*, 185–198.
- 450 (18) Helmers, E.; Chang, C. C.; Dauwels, J. Carbon Footprinting of Universities World-  
451 wide: Part I—Objective Comparison by Standardized Metrics. *Environmental Sciences*  
452 *Europe* **2021**, *33*, 30.
- 453 (19) Achten, W. M. J.; Almeida, J.; Muys, B. Carbon footprint of science: More than flying.  
454 *Ecological Indicators* **2013**, *34*, 352–355.



- 455 (20) van Ewijk, S.; Hoekman, P. Emission Reduction Potentials for Academic Conference  
456 Travel. *Journal of Industrial Ecology* **2021**, *25*, 778–788.
- 457 (21) Stevens, A. R. H.; Bellstedt, S.; Elahi, P. J.; Murphy, M. T. The imperative to reduce  
458 carbon emissions in astronomy. *Nature Astronomy* **2020**, *4*, 843–851.
- 459 (22) Knödlseeder, J.; Brau-Nogué, S.; Coriat, M.; Garnier, P.; Hughes, A.; Martin, P.;  
460 Tibaldo, L. Estimate of the carbon footprint of astronomical research infrastructures.  
461 *Nature Astronomy* **2022**, *6*, 503–513.
- 462 (23) WRI, *The Greenhouse Gas Protocol - A Corporate Accounting and Reporting Standard.*;  
463 Report, 2015.
- 464 (24) Robinson, O. J.; Tewkesbury, A.; Kemp, S.; Williams, I. D. Towards a universal carbon  
465 footprint standard: A case study of carbon management at universities. *Journal of*  
466 *Cleaner Production* **2018**, *172*, 4435–4455.
- 467 (25) Robinson, O. J.; Kemp, S.; Williams, I. D. In *HANDBOOK OF THEORY AND PRAC-*  
468 *TICE OF SUSTAINABLE DEVELOPMENT IN HIGHER EDUCATION, VOL 2*;  
469 Filho, W. L., Skanavis, C., DoPaco, A., Rogers, J., Kuznetsova, O., Castro, P., Eds.;  
470 2017; pp 441–452.
- 471 (26) Harangozo, G.; Szigeti, C. Corporate Carbon Footprint Analysis in Practice – With a  
472 Special Focus on Validity and Reliability Issues. *Journal of Cleaner Production* **2017**,  
473 *167*, 1177–1183.
- 474 (27) Gómez, N.; Cadarso, M.-Á.; Monsalve, F. Carbon Footprint of a University in a Multi-  
475 regional Model: The Case of the University of Castilla-La Mancha. *Journal of Cleaner*  
476 *Production* **2016**, *138*, 119–130.
- 477 (28) Mariette, J.; Blanchard, O.; Berné, O.; Ben-Ari, T. An open-source tool to assess the  
478 carbon footprint of research. *bioRxiv* **2021**,

- 479 (29) Minx, J. C. et al. INPUT-OUTPUT ANALYSIS AND CARBON FOOTPRINTING:  
480 AN OVERVIEW OF APPLICATIONS. *Economic Systems Research* **2009**, *21*, 187–  
481 216.
- 482 (30) Tukker, A.; Jansen, B. Environmental Impacts of Products: A Detailed Review of  
483 Studies. *Journal of Industrial Ecology* **2006**, *10*, 159–182.
- 484 (31) Suh, S. CEDA v.4.8 2014. <https://vitalmetrics.com/environmental-databases>.
- 485 (32) Ingwersen, W.; Li, M. Supply Chain Greenhouse Gas Emission Factors for US In-  
486 dustries and Commodities. Supply Chain Factors Dataset v1.0. [https://doi.org/10.](https://doi.org/10.23719/1517796)  
487 [23719/1517796](https://doi.org/10.23719/1517796).
- 488 (33) Yang, Y.; Ingwersen, W. W.; Hawkins, T. R.; Srocka, M.; Meyer, D. E. USEEIO: A new  
489 and transparent United States environmentally-extended input-output model. *Journal*  
490 *of Cleaner Production* **2017**, *158*, 308–318.
- 491 (34) ADEME, Documentation générale : Ratio monétaires. [https://bilans-ges.ademe.](https://bilans-ges.ademe.fr/fr/accueil/documentation-gene/index/siGras/1)  
492 [fr/fr/accueil/documentation-gene/index/siGras/1](https://bilans-ges.ademe.fr/fr/accueil/documentation-gene/index/siGras/1).
- 493 (35) Rebitzer, G.; Ekvall, T.; Frischknecht, R.; Hunkeler, D.; Norris, G.; Rydberg, T.;  
494 Schmidt, W. P.; Suh, S.; Weidema, B. P.; Pennington, D. W. Life cycle assessment:  
495 Part 1: Framework, goal and scope definition, inventory analysis, and applications.  
496 *Environment International* **2004**, *30*, 701–720.
- 497 (36) Carbon disclosure project. <https://www.cdp.net>.
- 498 (37) Mariette, J.; Blanchard, O.; Berné, O.; Aumont, O.; Carrey, J.; Ligozat, A.; Lel-  
499 louch, E.; Roche, P.-E.; Guennebaud, G.; Thanwerdas, J.; Bardou, P.; Salin, G.;  
500 Maigne, E.; Servan, S.; Ben-Ari, T. An open-source tool to assess the carbon foot-  
501 print of research. *Environmental Research: Infrastructure and Sustainability* **2022**, *2*,  
502 035008.

- 503 (38) GES 1point5. <https://apps.labos1point5.org/ges-1point5>.
- 504 (39) Labos 1point5. <https://labos1point5.org>.
- 505 (40) RTE, Bilan électrique 2019. [https://assets.rte-france.com/prod/public/](https://assets.rte-france.com/prod/public/2020-06/bilan-electrique-2019_1_0.pdf)  
506 [2020-06/bilan-electrique-2019\\_1\\_0.pdf](https://assets.rte-france.com/prod/public/2020-06/bilan-electrique-2019_1_0.pdf).
- 507 (41) IEA, Global Energy & CO2 Status Report 2019. [https://www.iea.org/reports/](https://www.iea.org/reports/global-energy-co2-status-report-2019/emissions/)  
508 [global-energy-co2-status-report-2019/emissions](https://www.iea.org/reports/global-energy-co2-status-report-2019/emissions/).
- 509 (42) OWID, Carbon intensity of electricity, 2022. [https://ourworldindata.org/grapher/](https://ourworldindata.org/grapher/carbon-intensity-electricity?tab=tabledonne2021)  
510 [carbon-intensity-electricity?tab=tabledonne2021](https://ourworldindata.org/grapher/carbon-intensity-electricity?tab=tabledonne2021).
- 511 (43) Farley, M.; Nicolet, B. P. Re-use of labware reduces CO2 equivalent footprint and  
512 running costs in laboratories. *bioRxiv* **2022**, 2022.01.14.476337.
- 513 (44) Herth, A.; Blok, K. Quantifying universities' direct and indirect carbon emissions – the  
514 case of Delft University of Technology. *International Journal of Sustainability in Higher*  
515 *Education* **2023**, *24*, 21–52.
- 516 (45) Stadler, K. et al. EXIOBASE 3: Developing a Time Series of Detailed Environmentally  
517 Extended Multi-Regional Input-Output Tables. *Journal of Industrial Ecology* **2018**,  
518 *22*, 502–515.
- 519 (46) Wiedenhofer, D.; Smetschka, B.; Akenji, L.; Jalas, M.; Haberl, H. Household time use,  
520 carbon footprints, and urban form: a review of the potential contributions of everyday  
521 living to the 1.5C climate target. *Current Opinion in Environmental Sustainability*  
522 **2018**, *30*, 7–17.
- 523 (47) AMUE, La nomenclature d'achats NACRES. [https://www.amue.fr/presentation/](https://www.amue.fr/presentation/articles/article/la-nomenclature-dachats-nacres-nouvelle-version/)  
524 [articles/article/la-nomenclature-dachats-nacres-nouvelle-version/](https://www.amue.fr/presentation/articles/article/la-nomenclature-dachats-nacres-nouvelle-version/), 2021.
